# Supplementary material for: Double exchange interaction promoted high-valence metal sites for neutral oxygen evolution reaction
Source: Royal Society of Chemistry journal article supplement (doi:10.1039/d0cc06453j), 2020-01-01
Supplement: d0cc06453j1.pdf [file d0cc06453j1.pdf]

## Supporting information

# Double exchange interaction promoted high-valence metal sites for neutral oxygen evolution reaction

Jisi Li, Jingjing Ma, Kun Du, Erling Zhao, Jiabin Guo\*, Jing Mao\*, Tao Ling\*

## Contents

|                                                                                         |     |
|-----------------------------------------------------------------------------------------|-----|
| <b>Experimental details</b>                                                             | S2  |
| <b>Supplementary Figures</b>                                                            |     |
| <i>Figure S1.</i> Synthetic schematic diagram of heteroatom-doped CoO nanorods.         | S3  |
| <i>Figure S2.</i> Characterization of pristine and heteroatom-doped CoO nanorods.       | S3  |
| <i>Figure S3.</i> EDS spectra of as-synthesized V, Mn, Ni-doped CoO nanorods.           | S4  |
| <i>Figure S4.</i> Chronoamperometric responses of heteroatom-doped CoO nanorods.        | S4  |
| <i>Figure S5.</i> SEM images of catalysts after stability test.                         | S5  |
| <i>Figure S6.</i> Structure characterization of catalysts after stability test.         | S6  |
| <i>Figure S7.</i> The ECSA-normalized LSV curves.                                       | S7  |
| <i>Figure S8.</i> Estimation electrochemically active surface areas of catalysts.       | S8  |
| <i>Figure S9.</i> Characterization and OER performance of V, Mn and Ni oxides nanorods. | S9  |
| <b>Supplementary Table</b>                                                              | S10 |
| <b>Supplementary References</b>                                                         | S10 |

## Experimental details

**Synthesis of pristine and heteroatom-doped CoO nanorods on carbon fiber substrate.** CoO nanorods were directly synthesized on carbon fiber substrate by a cation exchange method using ZnO NRs as structural templates described in our previous work.<sup>1-4</sup> Specially, doping precursor (VCl<sub>3</sub> or MnCl<sub>2</sub> or NiCl<sub>2</sub>) and cobalt chloride (CoCl<sub>2</sub>) powder were placed 2.5 cm upstream from the tube center to synthesize heteroatom-doped CoO nanorods (Fig. S1). For the synthesis of pristine CoO nanorods, pure CoCl<sub>2</sub> was used. The loading mass of as-synthesized pristine and heteroatom-doped CoO nanorods was ~0.2 mg cm<sup>-2</sup>.<sup>5</sup>

**Synthesis of V, Mn and Ni oxide nanorods on carbon fiber substrate.** Pure V, Mn and Ni oxide nanorods were prepared by cation exchange method, similar as pristine CoO nanorods. Specifically, VCl<sub>3</sub> or MnCl<sub>2</sub> or NiCl<sub>2</sub>) powder was placed 2.5 cm upstream from the tube center. The exchange temperature for V oxide was 550 °C and for Mn and Ni oxides was 600 °C.

**Materials characterization.** Scanning electron microscopy (SEM) and transmission electron microscopy (TEM) were characterized on a Hitachi S-4800 SEM and a JOEL 2100 TEM, respectively. X-ray diffraction (XRD) was performed on a Bruker D8 advance X-ray diffractometer. X-ray Photoelectron Spectroscopy (XPS) was carried out on a kalpa Thermo Fisher spectrometer (Thermo Fisher Scientific). The base pressure was about  $3 \times 10^{-9}$  mbar and the binding energies were referenced to the C 1s line at 284.8 eV from adventitious carbon. Electron paramagnetic resonance (EPR) was characterized on a JES-FA200 Electron spin paramagnetic resonance spectrometer, at liquid nitrogen temperature (-70 K) and applied potential of 1.6 V versus reversible hydrogen electrode (RHE).

**Electrochemical characterization.** Electrochemical measurements were performed in a three-electrode electrochemical cell using a calomel electrode saturated in KCl solution as the reference electrode, a graphite rod as the counter electrode and a electrocatalyst-loaded carbon fiber paper as the working electrode. The electrode potential was calibrated with respect to RHE in the high purity hydrogen saturated electrolyte and Pt worked as the working electrode. The polarization curves were recorded in 1 M phosphate buffer saline (PBS, pH=7) with a scan rate of 5 mV s<sup>-1</sup>.

## Supplementary Figures

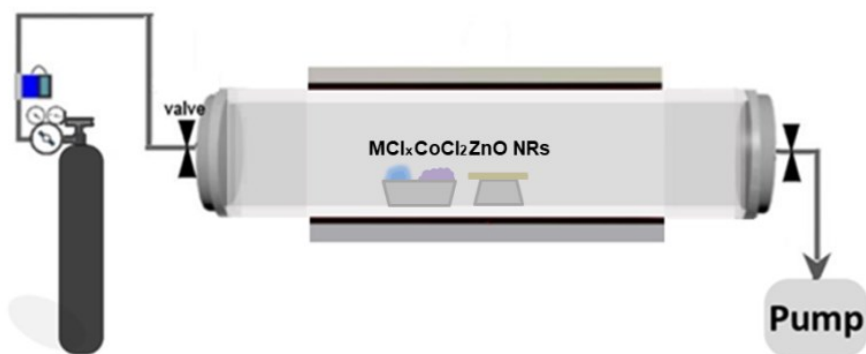

**Figure S1.** Synthetic schematic diagram of heteroatom-doped CoO nanorods. For the cation exchange process, the furnace was heated to 600 °C and maintained for 30 min under nitrogen gas flow (50 s.c.c.m.), then cooled to room temperature.

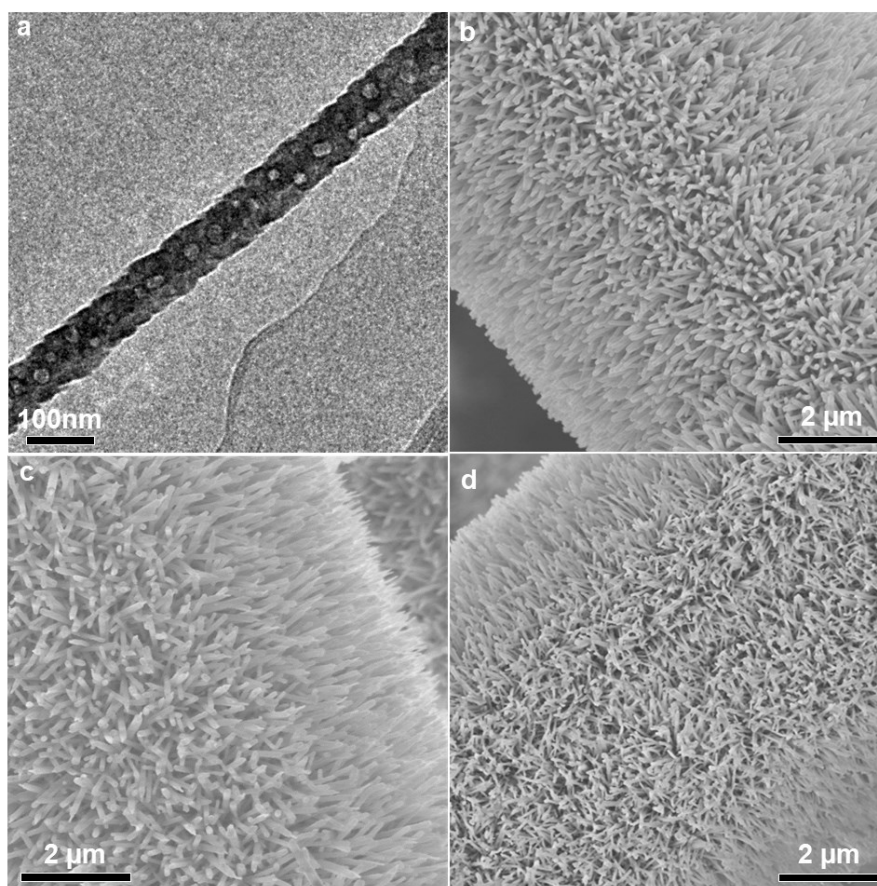

**Figure S2.** Characterization of pristine and heteroatom-doped CoO nanorods. (a) TEM of a single V-doped CoO nanorod. (b)-(d) SEM images of pristine, Mn-, and Ni-doped CoO nanorod arrays on carbon fiber, respectively.

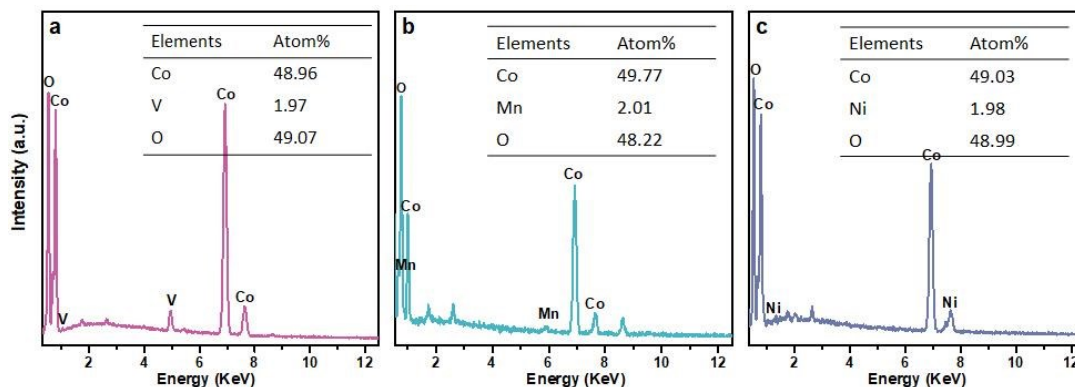

**Figure S3.** (a)-(c) EDS analysis of V-, Mn-, and Ni-doped CoO nanorods, respectively.

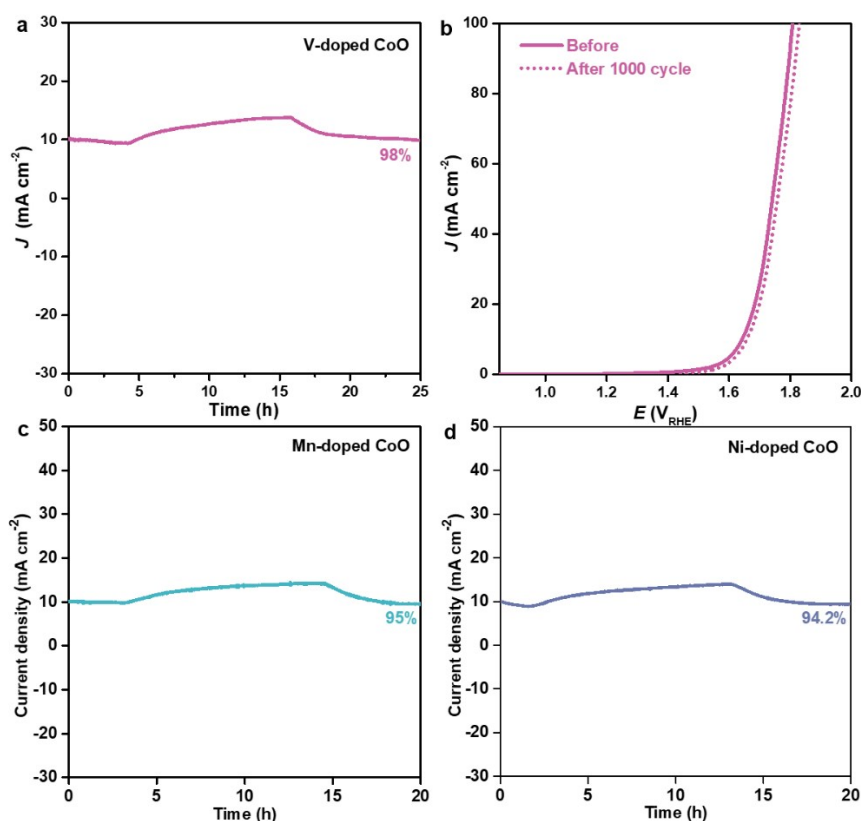

**Figure S4.** (a), (c) and (d) Chronoamperometric responses of V-, Mn- and Ni-doped CoO nanorods, respectively. (b) OER polarization curves of V-doped CoO nanorods before and after 1000 potential sweeps with scan rate of 100 mV s<sup>-1</sup> in 1.0 M PBS (pH=7) solution.

The chronoamperometric response demonstrates the high stability of the V-doped CoO nanorods, showing only a slight current attenuation of 2% after 25 h continuous testing (a). The accelerated stability test also confirms its reliable stability with slight shift of the OER polarization after 1000 continuous potential cycles (b). Similar stability was observed in the Mn- and Ni-doped CoO nanorods (c and d).

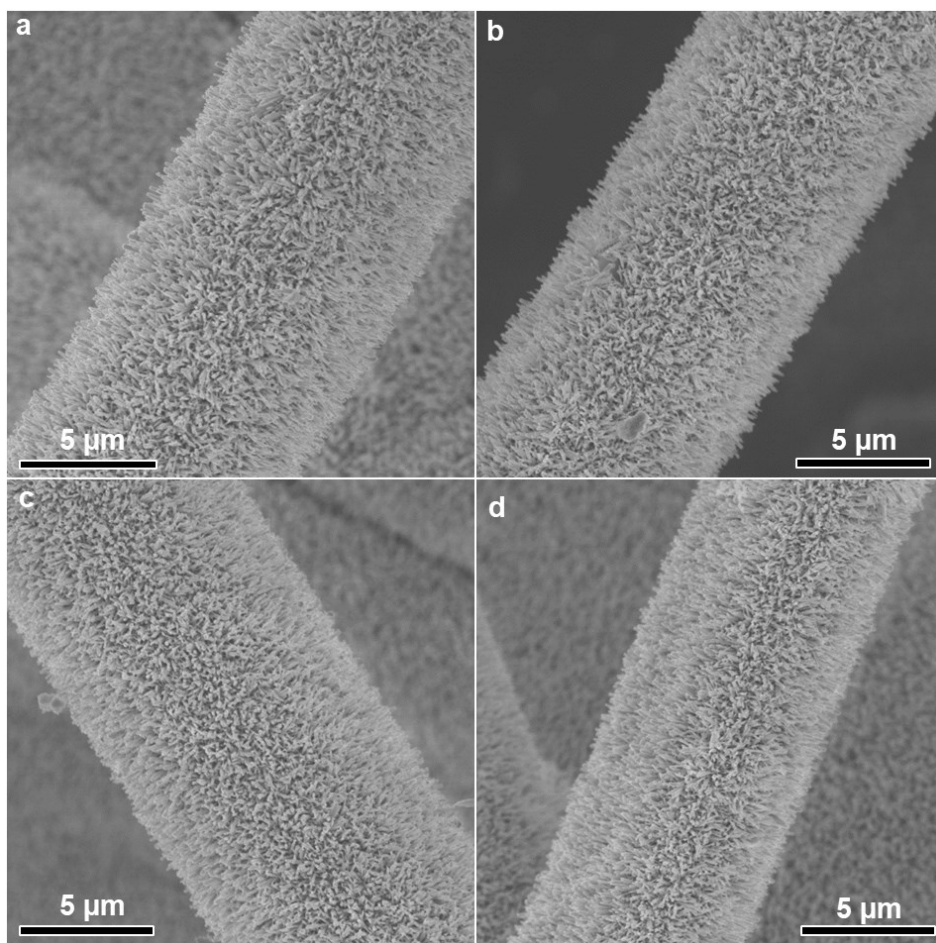

**Figure S5.** (a)-(d) SEM images of V-, Mn- and Ni-doped and pristine CoO nanorods after stability test, respectively, showing that the morphology of the nanorods was well preserved after the stability test.

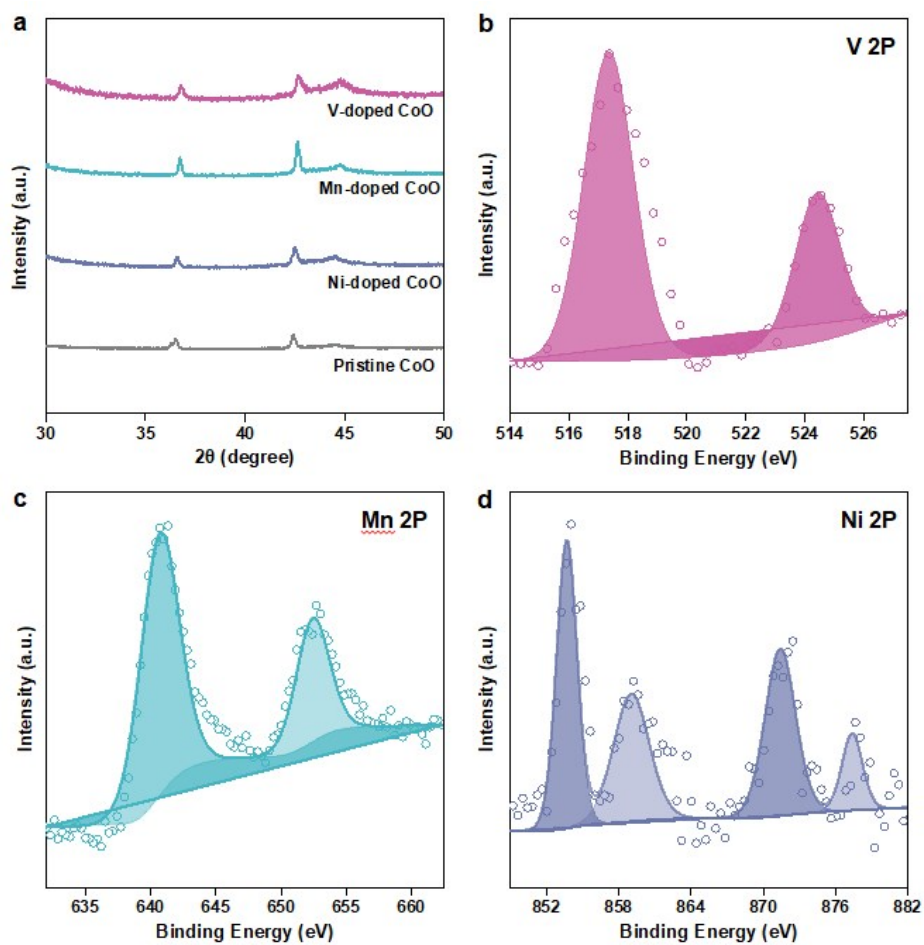

**Figure S6.** (a) XRD spectra of pristine and V, Mn, Ni-doped CoO nanorods. (b) V 2p, (c) Mn 2p, and (d) Ni 2p XPS spectra of heteroatom-doped CoO nanorods after stability test.

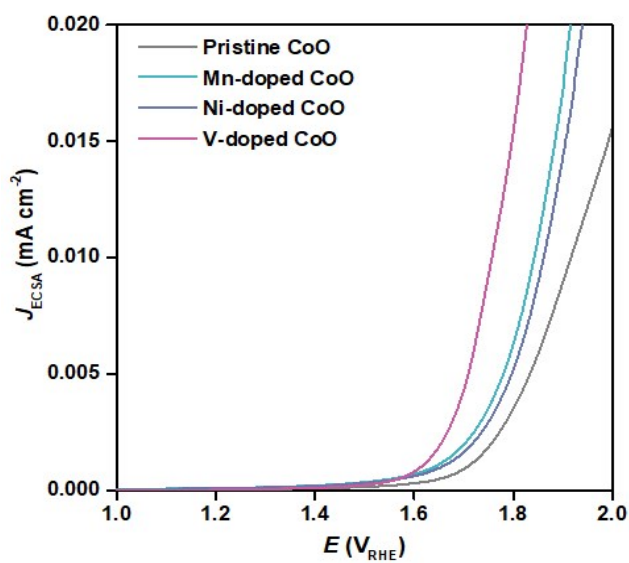

**Figure S7.** Electrochemically active surface areas (ECSA)-normalized LSV curves of pristine and heteroatom-doped CoO nanorods.

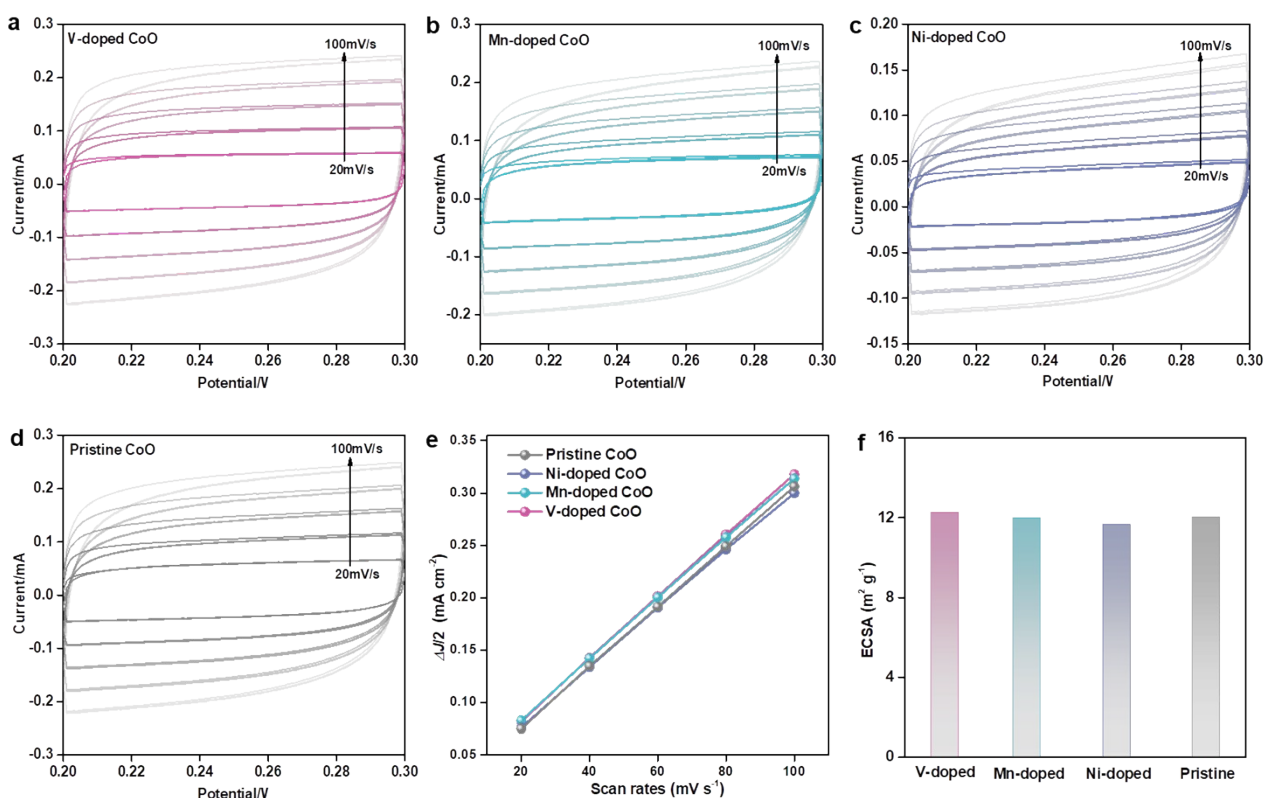

**Figure S8.** Estimation ECSAs of catalysts. (a)-(d) Cyclic voltammetry (CV) curves of V-, Mn-, Ni-doped and pristine CoO nanorods in 1.0 M PBS, respectively. (e) Plots of current density versus scan rate to determine the double layer capacitance ( $C_{dl}$ ). (f) Calculated ECSAs of V, Mn, Ni-doped and pristine CoO.

ECSA was calculated by the equations:

$$ECSA = \frac{R_f}{m_{\text{loading}}} \quad (S1)$$

$$R_f = \frac{C_{dl}}{C_s} \quad (S2)$$

where  $R_f$  is the roughness factor of catalyst,  $C_s$  is the specific capacitance of 60  $\mu\text{F cm}^{-2}$  for oxide, and  $m_{\text{loading}} = 0.2 \text{ mg cm}^{-2}$  is the mass-loading of the nanorod catalysts. As shown in (f), the ECSAs for the pristine and the heteroatom-doped CoO nanorods are almost identical.

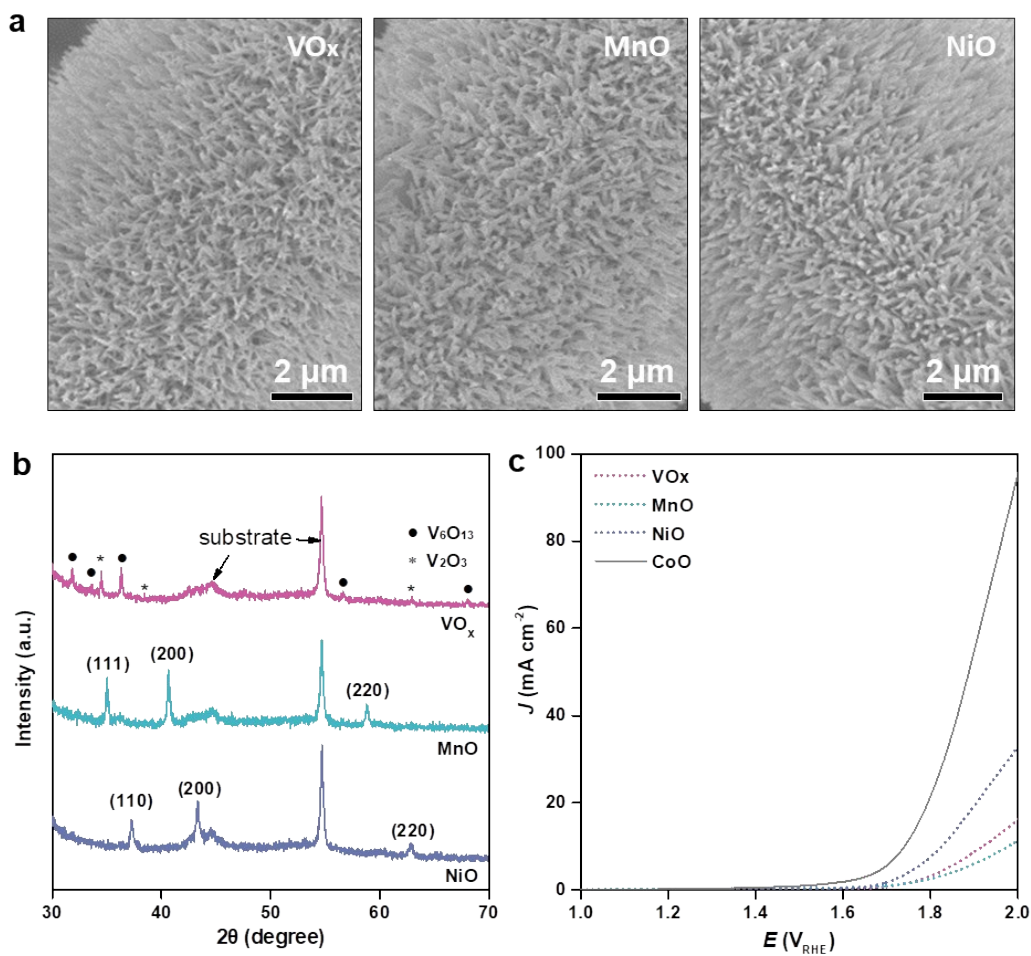

**Figure S9.** (a)-(c) SEM images, XRD spectra and neutral OER performance of VO<sub>x</sub>, MnO and NiO nanorods, respectively. As shown, the performance of these oxides was far inferior to that of the pristine CoO under identical test conditions, indicating that the dopants themselves were not active sites for neutral OER.



## Supplementary Figures

**Table S1.** Comparison of electrochemical performances of Co-contained water oxidation electrocatalysts in mild condition.

| Electrocatalysts                                     | Overpotential (mV)           | Tafel slope (mV dec <sup>-1</sup> ) | Electrolyte       | Ref.      |
|------------------------------------------------------|------------------------------|-------------------------------------|-------------------|-----------|
| V-doped CoO                                          | 412 @ 10mA cm <sup>-2</sup>  | 133                                 | pH 7, 1.0 M PBS   | This work |
| Co/ZnO                                               | 450 @ 10mA cm <sup>-2</sup>  | 106                                 | 0.1 M PBS         | [6]       |
| Co-Pi film                                           | 410 @ 1mA cm <sup>-2</sup>   | --                                  | pH 7, 0.1 M KPi   | [7]       |
| CeO <sub>2</sub> /Co-Bi                              | 453 @ 10mA cm <sup>-2</sup>  | 120                                 | pH 7.4, 0.1 M PBS | [8]       |
| Co-DP-MP@NCF <sup>a</sup>                            | 577 @ 30 mA cm <sup>-2</sup> | 129                                 | 0.1 M PBS         | [9]       |
| AC-Co <sub>2</sub> (OH) <sub>3</sub> Cl <sup>b</sup> | 600 @ 47 mA cm <sup>-2</sup> | 155                                 | 1.0 M PBS         | [10]      |

<sup>a</sup>Co(H<sub>2</sub>PO<sub>4</sub>)<sub>2</sub>/Co(PO<sub>3</sub>)<sub>2</sub> @ nanocarbon florets; <sup>b</sup>activation derived Co<sub>2</sub>(OH)<sub>3</sub>Cl components

## Supplementary References

1. C. Mu, J. Mao, J. Guo, Q. Guo, Z. Li, W. Qin, Z. Hu, K. Davey, T. Ling and S. Z. Qiao, *Adv. Mater.* 2020, **32**, 1907168.
2. Y.-J. Li, L. Cui, P.-F. Da, K.-W. Qiu, W.-J. Qin, W.-B. Hu, X.-W. Du, K. Davey, T. Ling and S.-Z. Qiao, *Adv. Mater.* 2018, **30**, 1804653.
3. T. Ling, P.-F. Da, X.-L. Zheng, B.-H. Ge, Z.-P. Hu, M.-Y. Wu, X.-W. Du, W.-B. Hu, M. Jaroniec and S.-Z. Qiao, *Sci. Adv.* 2018, **4**, 6261.
4. C. Meng, T. Ling, T.-Y. Ma, H. Wang, Z. Hu, Y. Zhou, J. Mao, X.-W. Du, M. Jaroniec and S.-Z. Qiao, *Adv. Mater.* 2017, **29**, 1604607.
5. T. Ling, D.-Y. Yan, Y. Jiao, H. Wang, Y. Zheng, X. Zheng, J. Mao, X.-W. Du, Z. Hu, M. Jaroniec and S.-Z. Qiao, *Nat. Commun.* 2016, **7**, 12876.
6. C. Meng, Y.-F. Gao, X.-M. Chen, Y.-X. Li, M.-C. Lin and Y. Zhou, *ACS Sustain. Chem. Eng.* 2019, **7**, 18055-18060.
7. Y. Dong, C. W. Oloman, E. L. Gyenge, J. Su and L. Chen, *Nanoscale* 2020, **12**, 9924-9934.

8. X. Zhou, S. Guo, Q. Cai and S. Huang, *Nanoscale Adv.* 2019, **1**, 3686-3692.
9. J. Saha, S. Verma, R. Ball, C. Subramaniam and R. Murugavel, *Small* 2020, **16**, 1903334.
10. H. Jiang, Q. He, X. Li, X. Su, Y. Zhang, S. Chen, S. Zhang, G. Zhang, J. Jiang, Y. Luo, P. M. Ajayan and L. Song, *Adv. Mater.* 2019, **31**, 1805127.
